# Supplementary material
Source: Springer Nature journal article supplement (https://springermedizin.de/resource/supplementary/13063_2010_535_MOESM1_ESM.pdf/9618382)
Supplement: MOESM1 [file 9618382]

1229 mothers assessed for eligibility from hospital records

100 excluded  
54 infants in NICU for 2+ weeks  
15 stillbirths or infant deaths  
11 home births  
9 non-residents of SA  
7 < 18 years  
4 other (e.g. adoption)

Randomised when child was aged 6 weeks (n=1129)

Allocated to opt-in (n=564)

Allocated to opt-out (n=565)

Invitation letter, information leaflet  
Reply form to opt in  
Asked to return form **if they wished to participate** (or telephone or email)

Invitation letter, information leaflet  
Reply form to opt out  
Asked to return form **if they did not wish to participate** (or telephone or email)

Parents who did not opt in

Parents who opted out

1° outcome: Participation rate

Parents who opted in

Parents who did not opt out

Could not be contacted

Could not be contacted

Could not be contacted

Could not be contacted

Telephone call when child was aged 10 weeks to parents who did not opt in

Telephone call when child was aged 10 weeks to parents who opted in

Telephone call when child was aged 10 weeks to parents who did not opt out

Telephone call when child was aged 10 weeks to parents who opted out

Declined to be interviewed

Declined to be interviewed

Declined to be interviewed

Declined to be interviewed

Recruited for interview

Recruited for interview

Recruited for interview

Recruited for interview

2° outcome: Recruitment rate for interview
